# Supplementary material
Source: PubMed Central journal article supplement (PMC3696821)
Supplement: 1302592110_pnas.201302592SI.pdf [file 1302592110_pnas.201302592SI.pdf]

# Supporting Information

Hemschemeier et al. 10.1073/pnas.1302592110

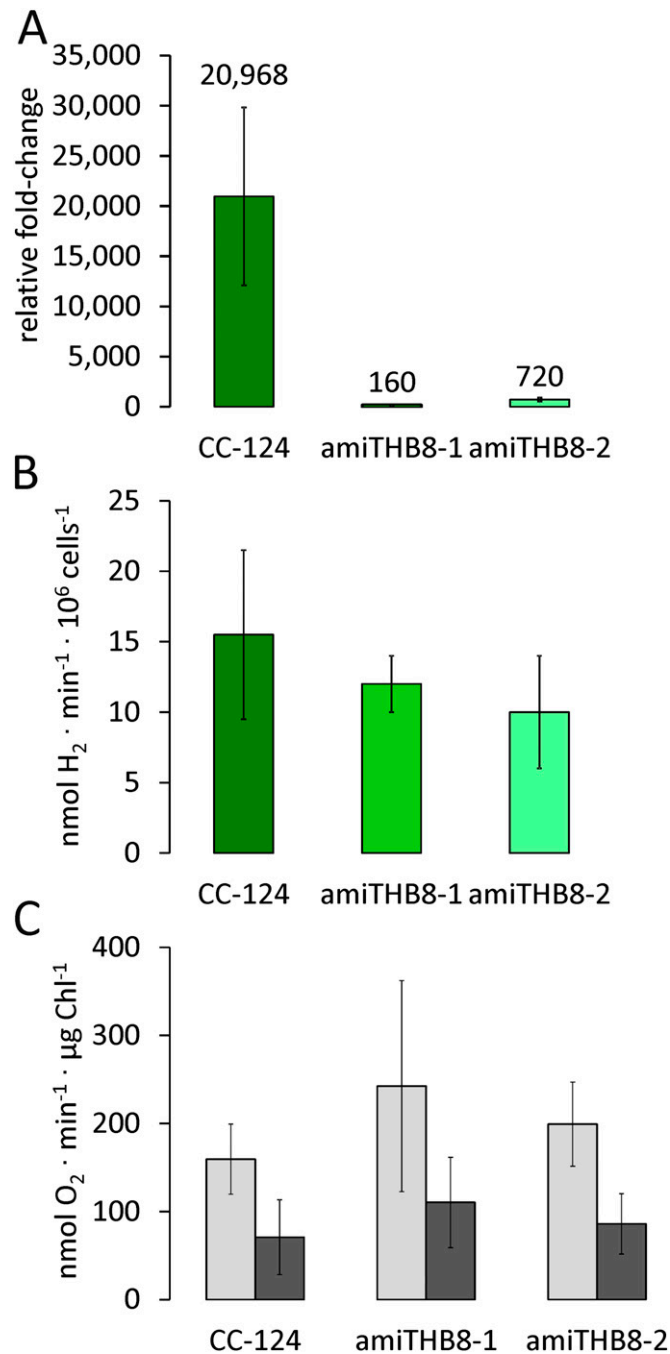

**Fig. S1.** Additional characteristics of the transformants in which *THB8* transcript amounts were reduced by applying the artificial microRNA (amiRNA) technology, *amiTHB8-1* and *-2*. (A) *Chlamydomonas reinhardtii* wild-type CC-124 and transformants *amiTHB8-1* and *-2* were grown aerated in the light and then incubated anaerobically in the dark for 7 h. RNA was extracted from the precultures and after dark-anoxic incubation. Quantitative real-time PCR (qPCR) analyses of relative *THB8* transcript amounts were done as described before (1). Fold-changes were calculated using the  $\Delta\Delta C(t)$  method. (B) In vitro hydrogenase activity of transformants *amiTHB8-1* and *amiTHB8-2* in comparison with strain CC-124 determined after 7 h of anaerobiosis. (C) O<sub>2</sub> evolution upon illumination (light gray bars) and O<sub>2</sub> uptake in the dark (dark gray bars) of the indicated strains grown aerobically in the light. (B and C) Hydrogenase activity and O<sub>2</sub> exchange rates were determined as described previously (2). (A–C) Bars show the average of two independent experiments. Error bars indicate the SD.

1. Pape M, Lambertz C, Happe T, Hemschemeier A (2012) Differential expression of the *Chlamydomonas* [FeFe]-hydrogenase-encoding *HYDA1* gene is regulated by the copper response regulator1. *Plant Physiol* 159(4):1700–1712.
2. Philipps G, Happe T, Hemschemeier A (2012) Nitrogen deprivation results in photosynthetic hydrogen production in *Chlamydomonas reinhardtii*. *Planta* 235(4):729–745.

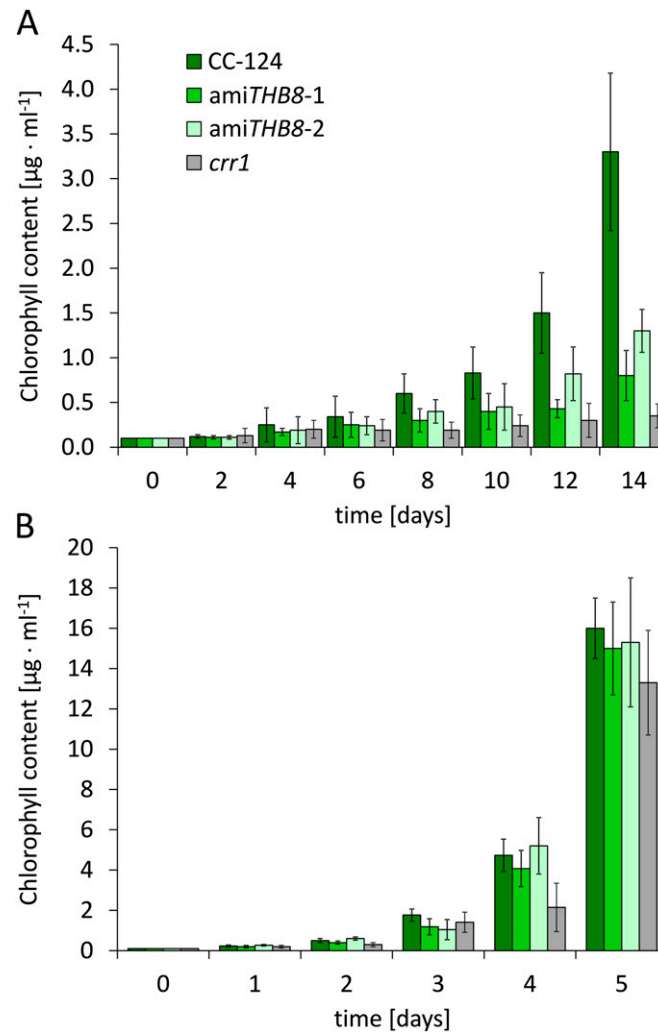

**Fig. S2.** Growth of the *C. reinhardtii* wild type and transformants *amiTHB8-1* and *-2*, as well as of the COPPER RESPONSE REGULATOR 1 (*crr1*) mutant under hypoxic conditions in dim light. (A) Algal cultures were inoculated at a chlorophyll concentration of  $0.1 \mu\text{g of Chl} \cdot \text{mL}^{-1}$  in 100 mL of Tris Acetate Phosphate (TAP) medium in squared glass bottles. These bottles were sealed with Suba Seals and incubated on a magnetic stirrer in dim light ( $15 \mu\text{mol of photons} \cdot \text{s}^{-1} \cdot \text{m}^{-2}$ ). The medium was continuously purged with 0.1%  $\text{CO}_2$  in  $\text{N}_2$ . After the indicated time points, samples were withdrawn for determining the chlorophyll content. The cellular chlorophyll content in units of  $\mu\text{g}$  of chlorophyll per 1 million cells was similar in all strains analyzed:  $3.2 \pm 0.2$  (CC-124),  $2.9 \pm 0.3$  (strain *amiTHB8-1*),  $3.0 \pm 0.5$  (strain *amiTHB8-2*), and  $2.6 \pm 0.4$  (*crr1* mutant). (B) Cells were equally inoculated and incubated under the same conditions, but purged with 0.1%  $\text{CO}_2$  in air.

1. Eriksson M, et al. (2004) Genetic dissection of nutritional copper signaling in *Chlamydomonas* distinguishes regulatory and target genes. *Genetics* 168(2):795–807.

**Table S1. List of Hb sequences used as queries to detect Hb encoding genes**

| Query                                                                                                                                                                                     | Hb type        | Hits <i>C. reinhardtii</i> * | Hits <i>Volvox carteri</i> *      |
|-------------------------------------------------------------------------------------------------------------------------------------------------------------------------------------------|----------------|------------------------------|-----------------------------------|
| >gi 44955888 ref NP_976312.1  myoglobin [Homo sapiens]                                                                                                                                    | 3/3Hb (Mb)     | None                         | None                              |
| >gi 56749856 sp P68871.2 HBB_HUMAN RecName: Full = Hemoglobin subunit beta; AltName: Full = Beta-globin; AltName: Full = Hemoglobin beta chain; Contains: RecName: Full = LVV-hemorphin-7 | 3/3Hb (Gb)     | None                         | None                              |
| >gi 57013850 sp P69905.2 HBA_HUMAN RecName: Full = Hemoglobin subunit alpha; AltName: Full = Alpha-globin; AltName: Full = Hemoglobin alpha chain                                         | 3/3Hb (Gb)     | None                         | None                              |
| >gi 19549331 ref NP_599030.1  cytoglobin [Homo sapiens]                                                                                                                                   | 3/3Hb (Cb)     | None                         | None                              |
| >gi 10864065 ref NP_067080.1  neuroglobin [Homo sapiens]                                                                                                                                  | 3/3Hb (Nb)     | None                         | None                              |
| >gi 168823435 ref NP_078970.3  androglobin [Homo sapiens]                                                                                                                                 | 3/3Hb (Ab)     | None <sup>†</sup>            | None                              |
| >gi 58332516 ref NP_001011196.1  x globin [ <i>Xenopus</i> (Silurana) tropicalis]                                                                                                         | 3/3Hb (GbX)    | None                         | None                              |
| >gi 14600601 ref NP_147118.1  protogloblin ApPgb [Aeropyrum pernix K1]                                                                                                                    | 3/3Hb (PGb)    | None                         | None                              |
| >gi 73670387 ref YP_306402.1  hypothetical protein Mbar_A2927 [Methanosarcina barkeri str. Fusaro]                                                                                        | 3/3Hb (PGb)    | None                         | None                              |
| >gi 154351341 gb ABS73420.1  HemAT [ <i>Bacillus amyloliquefaciens</i> FZB42]                                                                                                             | 3/3Hb (GCS)    | None                         | None                              |
| >gi 300817675 ref ZP_07097890.1  flavohemoprotein [ <i>Escherichia coli</i> MS 107-1]                                                                                                     | 3/3Hb (FHb)    | None                         | None <sup>‡</sup>                 |
| gi 3980177 emb CAA38024.1  leghemoglobin [ <i>Medicago sativa</i> ]                                                                                                                       | 3/3Hb (sHb)    | None                         | None                              |
| >gi 1518444 emb CAA90868.1  leghemoglobin B [ <i>Vicia faba</i> ]                                                                                                                         | 3/3Hb (sHb)    | None                         | None                              |
| >gi 441461 emb CAA54331.1  leghemoglobulin II [ <i>Lupinus luteus</i> ]                                                                                                                   | 3/3Hb (sHb)    | None                         | None                              |
| >gi 313503 emb CAA23731.1  leghemoglobin [ <i>Glycine max</i> ]                                                                                                                           | 3/3Hb (sHb)    | None                         | None                              |
| >gi 18015 emb CAA37898.1  hemoglobin [ <i>Casuarina glauca</i> ]                                                                                                                          | 3/3Hb (nsHb-1) | None                         | None                              |
| >gi 1707907 sp Q08753.1 TRHN1_CHLMO RecName: Full = Group 1 truncated hemoglobin LI637; Short = CtrHb; Short = Truncated Hb; AltName: Full = Globin LI637; Flags: Precursor               | 2/2Hb-I        | 12 hits <sup>§</sup>         | 10 hits <sup>¶</sup>              |
| >gi 1707909 sp P52334.1 TRHN2_CHLMO RecName: Full = Group 1 truncated hemoglobin LI410; Short = Truncated Hb; AltName: Full = Globin LI410; Flags: Precursor                              | 2/2Hb-I        | 10 hits <sup>  </sup>        | 9 hits <sup>**</sup>              |
| >gi 307107379 gb EFN55622.1  hypothetical protein CHLNCDRAFT_35393 [ <i>Chlorella variabilis</i> ]                                                                                        | 2/2Hb-I        | None                         | None                              |
| >gi 18418064 ref NP_567901.1  hemoglobin 3 [ <i>Arabidopsis thaliana</i> ]                                                                                                                | 2/2Hb-I        | None                         | Vocar20005548m.g, E-value 1.62e-2 |
| >gi 75318578 sp O65532 O65532_ARATH Hypothetical protein F4D11.110 (Hypothetical protein AT4g32690)                                                                                       | 2/2Hb-II       | None                         | None                              |
| >gi 55379358 ref YP_137208.1  cyanoglobin [Haloarcula marismortui ATCC 43049]                                                                                                             | 2/2Hb-I        | 10 hits <sup>  </sup>        | 9 hits <sup>**</sup>              |
| >gi 170078229 ref YP_001734867.1  cyanoglobin [ <i>Synechococcus</i> sp. PCC 7002]                                                                                                        | 2/2Hb-I        | 11 hits <sup>  </sup>        | 10 hits <sup>**</sup>             |
| >gi 16330583 ref NP_441311.1  cyanoglobin [ <i>Synechocystis</i> sp. PCC 6803]                                                                                                            | 2/2Hb-I        | 12 hits <sup>§</sup>         | 10 hits <sup>**</sup>             |
| >gi 15608680 ref NP_216058.1  glbN gene product [ <i>Mycobacterium tuberculosis</i> H37Rv]                                                                                                | 2/2Hb-I        | 11 hits <sup>  </sup>        | 10 hits <sup>**</sup>             |

Protein sequences used for BlastP analyses on Phytozome v8.0 *Chlamydomonas reinhardtii* v4.3 and *Volvox carteri*. Ab, androglobin; Cb, cytoglobin; Gb, animal  $\alpha$ - or  $\beta$ -globin; GbX, globin X; FHb, flavohemoglobin; 2/2Hb, 2-on-2 helices ("truncated") Hbs; 2/2Hb-I, -II, -III, 2/2Hbs group I, II, III; 3/3Hbs, 3-on-3 helices Hbs (myoglobin-fold); Mb, myoglobin; Nb, neuroglobin; nsHb, nonsymbiotic hemoglobin (nsHb-1, -2, nsHb class1, 2); PGb, protoglobin; sHb, symbiotic hemoglobin.

\*Phytozome v8.0, *Chlamydomonas reinhardtii* v.4.3, and *Volvox carteri*, BlastP using default settings.

<sup>†</sup>Two none-Hb domain containing proteins were detected, Cre12.g519950 (Flagellar Associated Protein, adenylate/guanylate kinase-like, E-value: 1.4e-8, and Cre10.g448850, Calpain cystein protease and Flagellar Associated Protein, E-value: 1.48e-3).

<sup>‡</sup>One hit Vocar20012052m.g, oxidoreductase, no hit using only the globin domain (1-148).

<sup>§</sup>All 12 (putative) 2/2Hbs identified as shown in Fig. 1 in the main article.

<sup>¶</sup>Vocar20011139m, Vocar20010321m, Vocar20010250m, Vocar20010617m, Vocar20010444m, Vocar20001214m, Vocar20005615m, Vocar20005548m, Vocar20002059m, Vocar20001900m.

<sup>||</sup>Included in the list shown in Fig. 1.

<sup>\*\*</sup>Included in ¶.

**Table S2. List of 2/2Hb sequences used for the phylogenetic analysis**

| Organism                                                      | Abbreviation               | Accession no. | Database  | Total protein length (aa)/position<br>2/2Hb-domain* [length 2/2Hb<br>domain (aa)] |
|---------------------------------------------------------------|----------------------------|---------------|-----------|-----------------------------------------------------------------------------------|
| <b>Prokaryota</b>                                             |                            |               |           |                                                                                   |
| <i>Acetobacter pasteurianus</i> IFO 3283-01                   | <i>A. past.</i>            | YP_003189286  | GenBank   | 193 /60-193(134)                                                                  |
| <i>Bacillus cereus</i> ATCC 10987                             | <i>B. cereus</i>           | NP_977638     | GenBank   | 132 /7-132(126)                                                                   |
| <i>Bordetella pertussis</i> Tohama I                          | <i>B. pertussis</i>        | NP_880766     | GenBank   | 134/1-124 (124)                                                                   |
| <i>Brachyspira murdochii</i> DSM 12563                        | <i>B. murdochii</i>        | YP_003632527  | GenBank   | 124/(124)                                                                         |
| <i>Bradyrhizobium japonicum</i> USDA 110                      | <i>B. japonicum</i>        | NP_772862     | GenBank   | 154/23-154 (132)                                                                  |
| <i>Burkholderia graminis</i> C4D1M                            | <i>B. graminis</i> C4D1M   | YP_02883481   | GenBank   | 180/11-130 (120)                                                                  |
| <i>Burkholderia multivorans</i> ATCC 17616                    | <i>B. multivorans</i>      | YP_001579609  | GenBank   | 184/14-134 (121)                                                                  |
| <i>Campylobacter coli</i> RM2228                              | <i>C. coli</i> RM2228      | ZP_003677734  | GenBank   | 150 /22-150(129)                                                                  |
| <i>Campylobacter fetus</i>                                    | <i>C. fetus</i>            | YP_892161     | GenBank   | 124 /(124)                                                                        |
| <i>Campylobacter jejuni</i> subsp. <i>jejuni</i> 1336         | <i>C. jejuni</i>           | ZP_06373377   | GenBank   | 127 /(127)                                                                        |
| <i>Campylobacter lari</i> RM2100                              | <i>C. lari</i> RM2100      | YP_002574763  | GenBank   | 127 /(127)                                                                        |
| <i>Campylobacter upsaliensis</i> RM3195                       | <i>C. upsaliensis</i>      | YP_00370192   | GenBank   | 129 /(129)                                                                        |
| <i>Chloroflexus aggregans</i> DSM 9485                        | <i>C. aggregans</i>        | YP_002462570  | GenBank   | 125 /(125)                                                                        |
| <i>Corynebacterium diphtheriae</i> NCTC 13129                 | <i>C. diphtheriae</i>      | NP_940138     | GenBank   | 130 /6-130(125)                                                                   |
| <i>Flavobacteria bacterium</i> BAL38                          | <i>Flavob. bact.</i> BAL38 | ZP_01733305   | GenBank   | 123 /(123)                                                                        |
| <i>Flavobacteria bacterium</i> BBFL7                          | <i>Flavob. bact.</i> BBFL7 | ZP_01200962   | GenBank   | 131 /(131)                                                                        |
| <i>Flavobacteriaceae bacterium</i> 3519-10                    | <i>F. bacterium</i>        | YP_003094561  | GenBank   | 125 /(125)                                                                        |
| <i>Frankia alni</i> ACN14a                                    | <i>Frankia</i> G1bO        | YP_712694     | GenBank   | 118 /2-118(117)                                                                   |
| <i>Frankia alni</i> ACN14a                                    | <i>Frankia</i> HbO         | YP_712079     | GenBank   | 135 /14-135(122)                                                                  |
| <i>Frankia</i> sp. Eul1c                                      | <i>Frankia</i> sp. Eul1c   | YP_004014801  | GenBank   | 150/8-150 (143)                                                                   |
| <i>Helicobacter bilis</i> ATCC 43879                          | <i>H. bilis</i>            | ZP_04580628   | GenBank   | 132 /3-132(130)                                                                   |
| <i>Helicobacter canadensis</i> MIT 98-5491                    | <i>H. canadensis</i>       | ZP_04869854   | GenBank   | 127 /(127)                                                                        |
| <i>Kordia algicida</i> OT-1                                   | <i>K. algicida</i>         | ZP_02163608   | GenBank   | 129 /(129)                                                                        |
| <i>Legionella longbeachae</i> D-4968                          | <i>L. longbeachae</i>      | ZP_06187916   | GenBank   | 128 /(128)                                                                        |
| <i>Methylobacterium chloromethanicum</i> CM4                  | <i>M. chloromethanicum</i> | YP_002423259  | GenBank   | 130 /(130)                                                                        |
| <i>Mycobacterium avium</i> 104                                | <i>M. avium</i>            | YP_883162     | GenBank   | 154 /5-127(123)                                                                   |
| <i>Mycobacterium leprae</i> TN                                | <i>M. leprae</i> G1bO      | NP_301903     | GenBank   | 128 /4-128(125)                                                                   |
| <i>Mycobacterium</i> sp. MCS                                  | <i>Myc. sp.</i> MCS        | YP_642448     | GenBank   | 162 /19-162 (144)                                                                 |
| <i>Mycobacterium tuberculosis</i> H37Ra                       | <i>M. tub. H37Ra</i>       | ZP_02552072   | GenBank   | 131 /7-131(125)                                                                   |
| <i>Mycobacterium tuberculosis</i> H37Rv                       | <i>M. tub. H37Rv</i>       | NP_216058     | GenBank   | 136 /14-136(123)                                                                  |
| <i>Nitrobacter</i> sp. Nb-311A                                | <i>N. sp.</i> Nb 311A      | ZP_01045872   | GenBank   | 140 /5-140(136)                                                                   |
| <i>Nostoc punctiforme</i> PCC 73102                           | <i>N. punctif.</i>         | YP_001864679  | GenBank   | 174 /58-174(122)                                                                  |
| <i>Oceanobacter</i> sp. RED65                                 | <i>Oceanobacter</i>        | ZP_01305408   | GenBank   | 121 /(121)                                                                        |
| <i>Ochrobactrum anthropi</i> ATCC 49188                       | <i>O. anthropi</i>         | YP_001370024  | GenBank   | 139 /6-139(134)                                                                   |
| <i>Paracoccus denitrificans</i> PD1222                        | <i>P. denitrificans</i>    | YP_917377     | GenBank   | 140 /9-140(132)                                                                   |
| <i>Pedobacter heparinus</i> DSM 2366                          | <i>P. heparinus</i>        | YP_003092108  | GenBank   | 129 /(129)                                                                        |
| <i>Pseudomonas syringae</i> pv. <i>syringae</i> B728a         | <i>P. syringae</i>         | YP_237008     | GenBank   | 142 /27-142 (116)                                                                 |
| <i>Rhizobium leguminosarum</i> bv. <i>viciae</i> 3841         | <i>R. leg. viciae</i>      | YP_765868     | GenBank   | 155 /22-155(134)                                                                  |
| <i>Ralstonia eutropha</i> H16                                 | <i>R. eutropha</i> H16     | YP_725533     | GenBank   | 138 /15-138(124)                                                                  |
| <i>Rhodococcus equi</i> 1035                                  | <i>R. equi</i>             | YP_004008063  | GenBank   | 128 /6-128(123)                                                                   |
| <i>Roseobacter</i> sp. MED193                                 | <i>Ros. sp.</i> MED193     | ZP_01057748   | GenBank   | 144 /11-144(134)                                                                  |
| <i>Roseiflexus castenholzii</i> DSM 13941                     | <i>R. castenholzii</i>     | YP_001431358  | GenBank   | 133 /(133)                                                                        |
| <i>Ruegeria pomeroyi</i> DSS-3                                | <i>R. pomeroyi</i> DSS-3   | YP_165021     | GenBank   | 139 /8-139(132)                                                                   |
| <i>Sacharophagus degradans</i>                                | <i>S. degradans</i>        | ABD80803      | GenBank   | 141 /15-141(127)                                                                  |
| <i>Sagittula stellata</i> E-37                                | <i>S. stellata</i>         | ZP_01747349   | GenBank   | 134 /3-134(132)                                                                   |
| <i>Silicibacter</i> sp. TrichCH4B                             | <i>Sil. sp.</i> TrichCH4B  | ZP_05741205   | GenBank   | 137 /6-137(132)                                                                   |
| <i>Sinorhizobium meliloti</i> 1021                            | <i>S. meliloti</i>         | NP_386684     | GenBank   | 155 /22-155(134)                                                                  |
| <i>Sphingomonas</i> sp. SKA58                                 | <i>Sph. sp.</i> SKA58      | ZP_01304894   | GenBank   | 145 /1-121(121)                                                                   |
| <i>Synechocystis</i> sp. PCC 6803                             | <i>S. CyGLB</i>            | NP_441311     | GenBank   | 124 /(124)                                                                        |
| <i>Tetrahymena pyriformis</i>                                 | <i>T. pyr</i> HbN          | P17724        | GenBank   | 121/6-121 (116)                                                                   |
| <i>Thiomonas intermedia</i> K12                               | <i>T. intermedia</i>       | YP_003643170  | GenBank   | 162 /43-162(120)                                                                  |
| <i>Xanthomonas axonopodis</i> pv. <i>punicae</i> str. LMG 859 | <i>X. axonopodis</i>       | ZP_10260820   | GenBank   | 142 /27-142(116)                                                                  |
| <b>Eukaryota</b>                                              |                            |               |           |                                                                                   |
| <i>Paramecium caudatum</i>                                    | <i>P. caudatum</i>         | P15160        | GenBank   | 117/2-116 (116)                                                                   |
| <b>Chlorophyta</b>                                            |                            |               |           |                                                                                   |
| <i>Chlamydomonas meowusii</i>                                 | <i>CmHBN</i>               | Q08753        | GenBank   | 164 /44-164(121)                                                                  |
| <i>Chlamydomonas reinhardtii</i>                              | <i>CrTHB1</i>              | Cre14.g615400 | Phytozome | 136/10-129 (120)                                                                  |
| <i>Chlamydomonas reinhardtii</i>                              | <i>CrTHB2</i>              | Cre14.g615350 | Phytozome | 147/ 27-147 (121)                                                                 |
| <i>Chlamydomonas reinhardtii</i>                              | <i>CrTHB3</i>              | Cre04.g218800 | Phytozome | 297/105-225(121)                                                                  |
| <i>Chlamydomonas reinhardtii</i>                              | <i>CrTHB4</i>              | Cre04.g218750 | Phytozome | 214/ 59-178 (120)                                                                 |

Table S2. Cont.

| Organism                                     | Abbreviation      | Accession no.  | Database  | Total protein length (aa)/position<br>2/2Hb-domain* [length 2/2Hb<br>domain (aa)] |
|----------------------------------------------|-------------------|----------------|-----------|-----------------------------------------------------------------------------------|
| <i>Chlamydomonas reinhardtii</i>             | CrTHB5D1          | Cre07.g351100  | Phytozome | 959 /62–182 (121)                                                                 |
| <i>Chlamydomonas reinhardtii</i>             | CrTHB5D2          | Cre07.g351100  | Phytozome | 959/203–326(124)                                                                  |
| <i>Chlamydomonas reinhardtii</i>             | CrTHB6            | Cre16.g654250  | Phytozome | 347 /99–224 (126)                                                                 |
| <i>Chlamydomonas reinhardtii</i>             | CrTHB7            | Cre16.g661000  | Phytozome | 292 /54–182 (129)                                                                 |
| <i>Chlamydomonas reinhardtii</i>             | CrTHB8            | Cre16.g661200  | Phytozome | 519 /46–166 (121)                                                                 |
| <i>Chlamydomonas reinhardtii</i>             | CrTHB9            | Cre16.g661250  | Phytozome | 712 /53–176 (124)                                                                 |
| <i>Chlamydomonas reinhardtii</i>             | CrTHB10           | Cre16.g661300  | Phytozome | 483 /53–175 (123)                                                                 |
| <i>Chlamydomonas reinhardtii</i>             | CrTHB11           | Cre16.g662750  | Phytozome | 395 /51–163 (113)                                                                 |
| <i>Chlamydomonas reinhardtii</i>             | CrTHB12           | Cre16.g663000  | Phytozome | 432 /46–166 (121)                                                                 |
| <i>Chlorella</i> sp. NC64A                   | C64THB1           | EFN57932       | GenBank   | 107/(107)                                                                         |
| <i>Chlorella</i> sp. NC64A                   | C64THB2           | EFN56894.1     | GenBank   | 151 /28–151 (124)                                                                 |
| <i>Chlorella</i> sp. NC64A                   | C64THB3           | EFN59290.1     | GenBank   | 217 /15–141 (127)                                                                 |
| <i>Chlorella</i> sp. NC64A                   | C64THB4           | EFN55622.1     | GenBank   | 244 /59–180 (122)                                                                 |
| <i>Chlorella</i> sp. NC64A                   | C64THB5           | EFN59229       | GenBank   | 124 /7–124 (118)                                                                  |
| <i>Micromonas pusilla</i> CCMP1545           | MpTHB1            | XP_003064586   | GenBank   | 111 /2–111 (110)                                                                  |
| <i>Volvox carteri</i> .f. <i>nagariensis</i> | VcTHB1            | Vocar20001214m | Phytozome | 142 /22–142(121)                                                                  |
| <i>Volvox carteri</i> .f. <i>nagariensis</i> | VcTHB2            | Vocar20001900m | Phytozome | 290/142–270(129)                                                                  |
| <i>Volvox carteri</i> .f. <i>nagariensis</i> | VcTHB3            | Vocar20002059m | Phytozome | 161 /6–127 (122)                                                                  |
| <i>Volvox carteri</i> .f. <i>nagariensis</i> | VcTHB4            | Vocar20005548m | Phytozome | 462 /69–184 (116)                                                                 |
| <i>Volvox carteri</i> .f. <i>nagariensis</i> | VcTHB5            | Vocar20005615m | Phytozome | 319 /64–184 (121)                                                                 |
| <i>Volvox carteri</i> .f. <i>nagariensis</i> | VcTHB6            | Vocar20010250m | Phytozome | 399/146–280(135)                                                                  |
| <i>Volvox carteri</i> .f. <i>nagariensis</i> | VcTHB7            | Vocar20010321m | Phytozome | 521 /51–171 (121)                                                                 |
| <i>Volvox carteri</i> .f. <i>nagariensis</i> | VcTHB8            | Vocar20010444m | Phytozome | 729 /25–145 (121)                                                                 |
| <i>Volvox carteri</i> .f. <i>nagariensis</i> | VcTHB9            | Vocar20010617m | Phytozome | 528 /54–174 (121)                                                                 |
| <i>Volvox carteri</i> .f. <i>nagariensis</i> | VcTHB10           | Vocar20011139m | Phytozome | 244 /85–208 (124)                                                                 |
| Planta                                       |                   |                |           |                                                                                   |
| <i>Arabidopsis thaliana</i>                  | <i>A.thal.</i>    | NP_567901      | GenBank   | 175/26–147 (122)                                                                  |
| <i>Glycine max</i>                           | <i>G.max</i>      | NP_001237344   | GenBank   | 172/26–147 (122)                                                                  |
| <i>Vitis vinifera</i>                        | <i>V.vinifera</i> | XP_002284484   | GenBank   | 169/26–147 (122)                                                                  |

From left to right, columns indicate sequence origin, sequence abbreviation used in Fig. 2 in the main article, accession number of the polypeptide sequence, and data bank source, as well as total protein length, position, and length of compared 2/2Hb domains.

\*No numbers are indicated when the whole protein was used.

**Table S3. Relative transcript abundances of the indicated genes in anaerobic *C. reinhardtii* wild-type CC-124 and transformants amiTHB8-1 and -2**

| Gene                 | Relative transcript abundance |           |           | amiTHB8-1 vs. CC-124 | amiTHB8-2 vs. CC-124 |
|----------------------|-------------------------------|-----------|-----------|----------------------|----------------------|
|                      | CC-124                        | amiTHB8-1 | amiTHB8-2 |                      |                      |
| <i>HYDA1</i>         | 53                            | 67        | 47        | 1.3                  | 0.9                  |
| <i>HYDA2</i>         | 6                             | 1         | 3         | 0.2                  | 0.5                  |
| <i>HYDEF</i>         | 4                             | 3         | 6         | 0.8                  | 1.4                  |
| <i>HYDG</i>          | 13                            | 5         | 10        | 0.4                  | 0.8                  |
| <i>PFR1</i>          | 3.9                           | 2.5       | 1.9       | 0.6                  | 0.5                  |
| <i>PFL1</i>          | 65                            | 29        | 45        | 0.4                  | 0.7                  |
| <i>CRR1</i>          | 40                            | 31        | 48        | 0.8                  | 1.2                  |
| <i>CPX1</i>          | 483                           | 429       | 525       | 0.9                  | 1.1                  |
| <i>CYC6</i>          | 16                            | 79        | 65        | 4.8                  | 4.0                  |
| <i>FDX5</i>          | 646                           | 443       | 497       | 0.7                  | 0.8                  |
| <i>CAT1</i>          | 11                            | 19        | 19        | 1.8                  | 1.8                  |
| <i>MSD3</i>          | 0.4                           | 0.6       | 1.5       | 1.5                  | 3.5                  |
| <i>HCP4</i>          | 14                            | 3         | 9         | 0.2                  | 0.6                  |
| <i>CYG12</i>         | 0.6                           | 0.1       | 0.2       | 0.2                  | 0.3                  |
| <i>THB8</i>          | 6                             | 0.03      | 0.1       | 0.01                 | 0.02                 |
| <i>RBOL2</i>         | 0.1                           | 0.06      | 0.08      | 0.5                  | 0.7                  |
| <i>HSP22A</i>        | 474                           | 770       | 1043      | 1.6                  | 2.2                  |
| <i>DES6</i>          | 0.1                           | 0.4       | 0.4       | 2.9                  | 2.4                  |
| <i>NAR1.3</i>        | 1.6                           | 0.6       | 1.0       | 0.4                  | 0.6                  |
| <i>Cre12.g512400</i> | 5                             | 4         | 5         | 0.7                  | 1.0                  |
| <i>Cre01.g013450</i> | 0.01                          | 0.01      | 0.007     | 1.0                  | 0.6                  |
| <i>Cre16.g668550</i> | 3                             | 5         | 2         | 1.4                  | 0.7                  |
| <i>Cre03.g209200</i> | 2.4                           | 4.3       | 4.2       | 1.8                  | 1.7                  |

*C. reinhardtii* wild-type CC-124 and transformants amiTHB8-1 and -2 were incubated in the absence of O<sub>2</sub> in the dark for 7 h. Relative transcript abundances were determined by qPCR as described by Pape et al. (1). The calculated values were multiplied by 1,000. Indicated genes encode the following proteins: *CAT1*, catalase; *CPX1*, coproporphyrinogen III oxidase; *Cre01.g013450*, hemerythrin HHE cation binding domain containing protein; *Cre03.g209200*, RRM (RNA recognition motif) containing protein; *Cre12.g512400*, protein containing Sigma-54 interaction domain; *Cre16.g668550*, RING- and FYVE-type zinc finger containing protein; *CRR1*, Copper Response Regulator 1; *CYC6*, cytochrome c<sub>6</sub>; *CYG12*, heme/nitric oxide-binding guanylate cyclase; *DES6*, omega-6-fatty acid desaturase, chloroplast isoform; *FDX5*, ferredoxin 5; *HCP4*, hybrid cluster protein 4; *HSP22A*, small heat-shock protein 22A; *HYDA1* and *HYDA2*, [FeFe]-hydrogenase isoforms HYDA1 and HYDA2; *HYDEF* and *HYDG*, [FeFe]-hydrogenase assembly proteins HYDEF and HYDG; *MSD3*, Mn superoxide dismutase; *NAR1.3*, formate nitrite transporter; *PFL1*, pyruvate:formate lyase 1; *PFR1*, pyruvate:ferredoxin oxidoreductase 1; *RBOL2*, respiratory burst oxidase 2; *THB8*, truncated hemoglobin 8.

1. Pape M, Lambert C, Happe T, Hemschemeier A (2012) Differential expression of the *Chlamydomonas* [FeFe]-hydrogenase-encoding *HYDA1* gene is regulated by the copper response regulator1. *Plant Physiol* 159(4):1700–1712.
